# Supplementary material
Source: HighWire-hosted journal article supplement (http://www.qdcxjkg.com/highwire/filestream/113871/field_highwire_adjunct_files/0/ERJ-01047-2012_Disclosures.pdf)
Supplement: ERJ-01047-2012_Disclosures.pdf [file ERJ-01047-2012_Disclosures.pdf]

**A. Bustamante** has received reimbursement for attending a symposium from Astra Zeneca, Grifols, Almirall and Boehinger-Ingelheim. Fees for speaking from Astra-Zeneca, Almirall, MSD, Boehinger-Ingelheim, Pfizer.

**I. Ferrarotti** received research grants from Talecris/Grifols, provided paid lectures for Kedrion Italy, and received support for attending ERS conferences from Talecris/Grifols.

**B. Lara** received honoraria for developing REDAAT database management from Grifols.

**M. Luisetti** received research grants from Talecris/Grifols, provided paid lectures for Kedrion Italy, and received financial support to the AATD detection programme from Talecris/Grifols and Kedrion Italy.

**M. Miravittles** has received speaker fees from Boehringer Ingelheim, Pfizer, AstraZeneca, Bayer Schering, Novartis, Talecris, Nycomed, Merck, Sharp & Dohme and Novartis, and consulting fees from Boehringer Ingelheim, Pfizer, GSK, AstraZeneca, Bayer Schering, Novartis, Almirall, Merck, Sharp & Dohme and Nycomed.

**S. Ottaviani** received research grants from Talecris/Grifols and received support for attending ERS conferences from Talecris/Grifols.
